# Supplementary material for: Alkylammonium thiostannate inorganic/organic hybrids as high-performance photocatalysts with a decoupled adsorption–photodegradation mechanism
Source: Royal Society of Chemistry journal article supplement (doi:10.1039/c9ra01486a), 2019-01-01
Supplement: c9ra01486a1.pdf [file c9ra01486a1.pdf]

## Electronic Supplementary Information

### Alkylammonium thiostannate inorganic/organic hybrids as high-performance photocatalysts with a decoupled adsorption-photodegradation mechanism

*Xiufang Hao,<sup>a</sup> Xiaoyan Cui<sup>a</sup>, Meiqi Hu<sup>a</sup>, Yiming Jia<sup>a</sup>, Xinxin Li<sup>b</sup>, Shuo Wei<sup>\*a</sup> and Jun Lu<sup>c</sup>*

**Table S1.** The full elements analyses of three compounds

|                            | H                | C               | N                | Sn               |
|----------------------------|------------------|-----------------|------------------|------------------|
| $(C_4H_9NH_3)_2Sn_3S_7$    | 12.90<br>(13.18) | 3.77<br>(3.84)* | 3.276<br>(3.332) | 48.38<br>(48.64) |
| $(C_6H_{13}NH_3)_2Sn_3S_7$ | 19.47<br>(18.35) | 3.61<br>(3.57)  | 4.490<br>(4.08)  | 44.86<br>(45.26) |
| $(C_8H_{17}NH_3)_2Sn_3S_7$ | 20.94<br>(22.84) | 2.91<br>(3.33)  | 4.599<br>(4.76)  | 41.91<br>(42.24) |

\*The data in the bracket was the calculated value from the formula  $A_2Sn_3S_7$

**Table S2** Binding Energies (in eV) of the Main Core Level Spectrum for the  $A_2Sn_3S_7$

|                  | S2p               |                   | Sn3d              |                   |
|------------------|-------------------|-------------------|-------------------|-------------------|
|                  | 2p <sub>1/2</sub> | 2p <sub>3/2</sub> | 3d <sub>3/2</sub> | 3d <sub>5/2</sub> |
| $(baH)_2Sn_3S_7$ | 162.55            | 161.54            | 495.32            | 486.82            |
| $(haH)_2Sn_3S_7$ | 162.54            | 161.59            | 495.32            | 486.82            |
| $(oaH)_2Sn_3S_7$ | 162.57            | 161.57            | 495.32            | 486.87            |

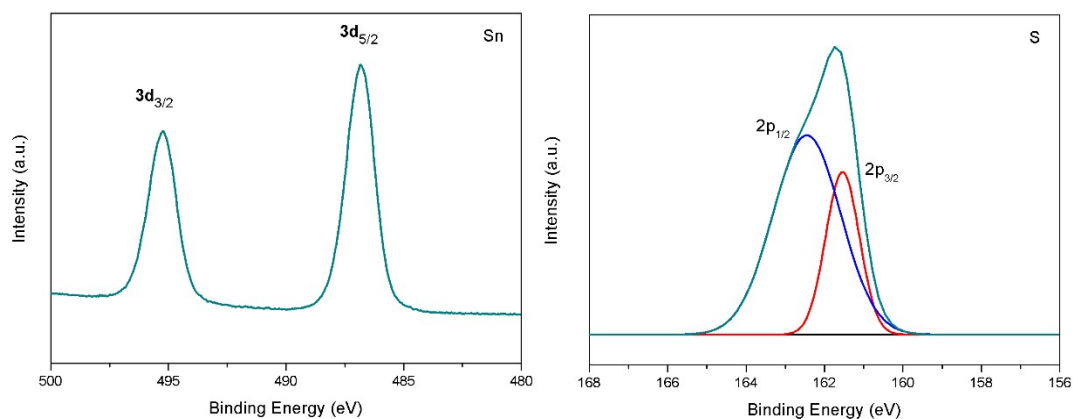

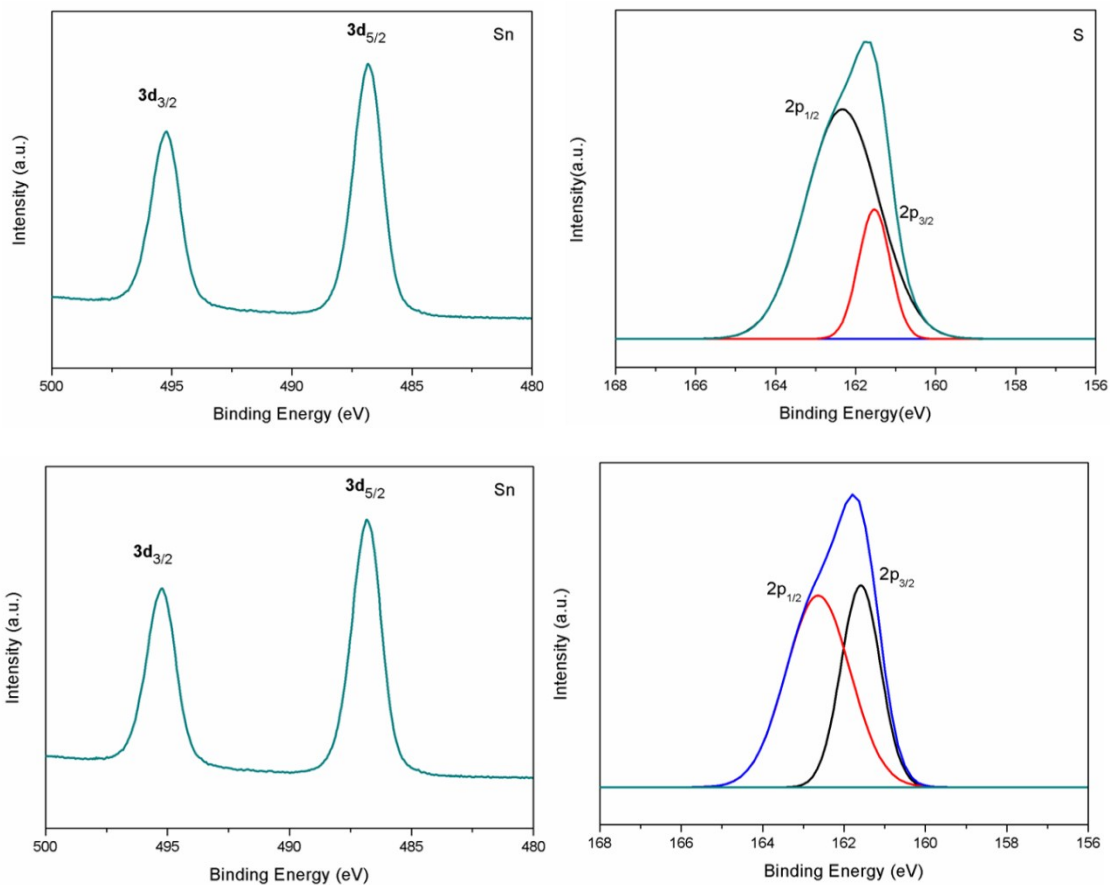

**Figure.S1** The Sn and S XPS spectra of  $A_2Sn_3S_7$ , A was baH, haH, and oaH, respectively from top to bottom.

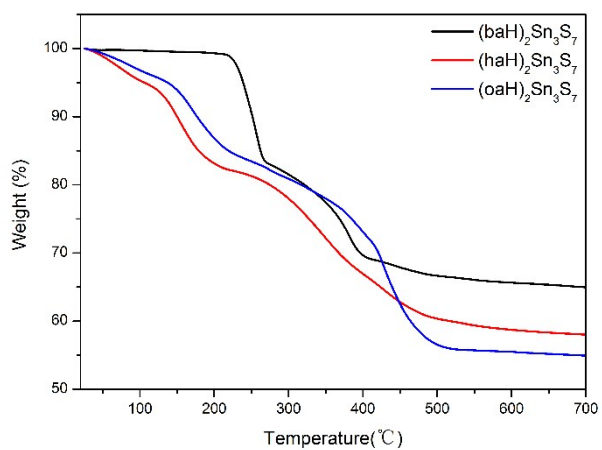

**Figure.S2** Thermogravimetric curves for  $A_2Sn_3S_7$

**Table S3.** Comparison of the adsorption capacities on various adsorbents for RhB.

| Adsorbent                                         | Capacity(mg/g) | Ref.              |
|---------------------------------------------------|----------------|-------------------|
| (baH) <sub>2</sub> Sn <sub>3</sub> S <sub>7</sub> | 1305           | This work         |
| (oaH) <sub>2</sub> Sn <sub>3</sub> S <sub>7</sub> | 1149           | This work         |
| (haH) <sub>2</sub> Sn <sub>3</sub> S <sub>7</sub> | 1047           | This work         |
| HP-TPPO-3                                         | 828.6          | Ref <sup>33</sup> |
| In-MOF@GO-2                                       | 267            | Ref <sup>34</sup> |
| Au-CN <sub>x</sub>                                | 250            | Ref <sup>35</sup> |
| SnS <sub>2</sub>                                  | 200.0          | Ref <sup>36</sup> |
| HSA                                               | 185.61         | Ref <sup>37</sup> |
| W <sub>18</sub> O <sub>49</sub> nanowire          | 120            | Ref <sup>38</sup> |
| SnS <sub>2</sub> /rGO                             | 94.07          | Ref <sup>39</sup> |
| MoS <sub>2</sub>                                  | 49.2           | Ref <sup>40</sup> |

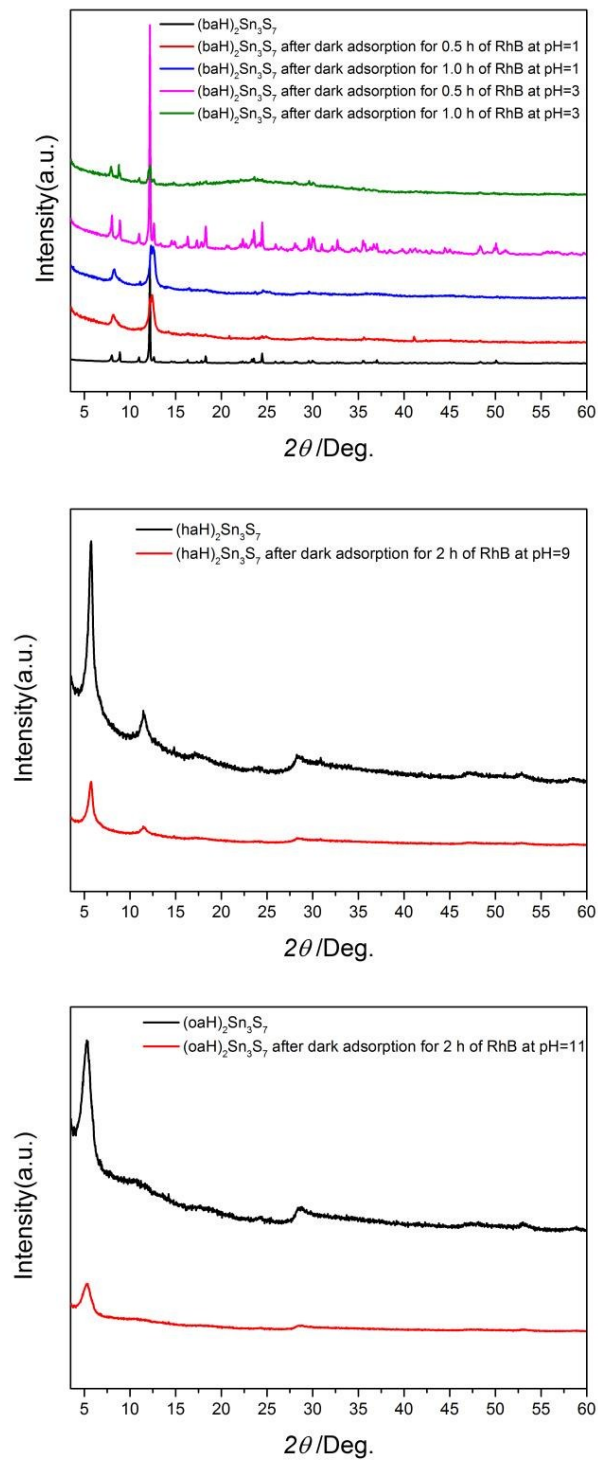

**Figure.S3** The PXRD of A<sub>2</sub>Sn<sub>3</sub>S<sub>7</sub> in solution with different pH at a specific time.

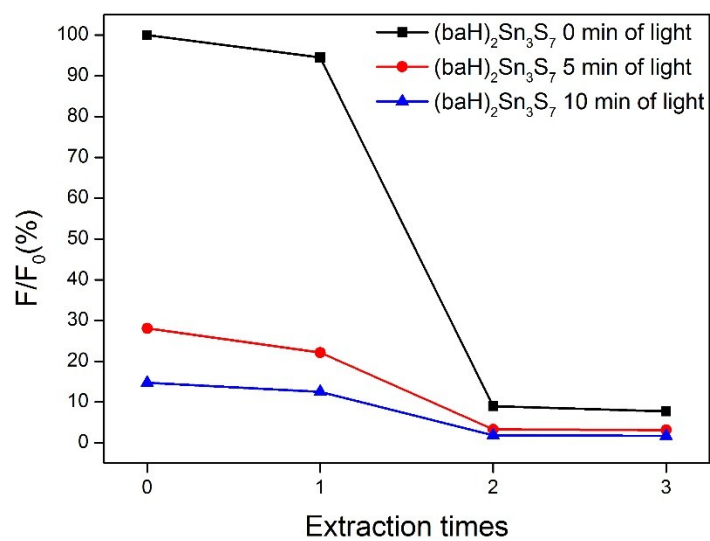

**Figure.S4** The Fluorescence intensity of undegraded RhB in photocatalytic process with multiple dispersive liquid-liquid microextraction for three extraction cycles

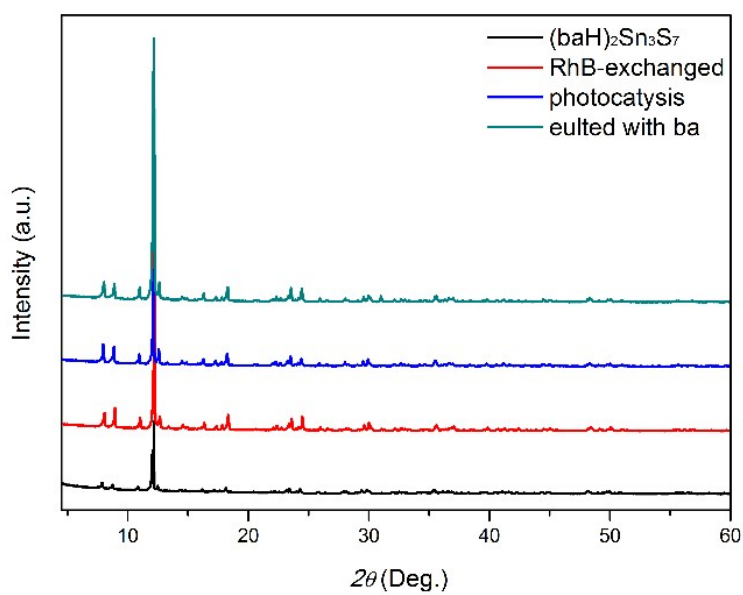

**Figure.S5** PXRD of (baH)<sub>2</sub>Sn<sub>3</sub>S<sub>7</sub> catalyst in cycle process.

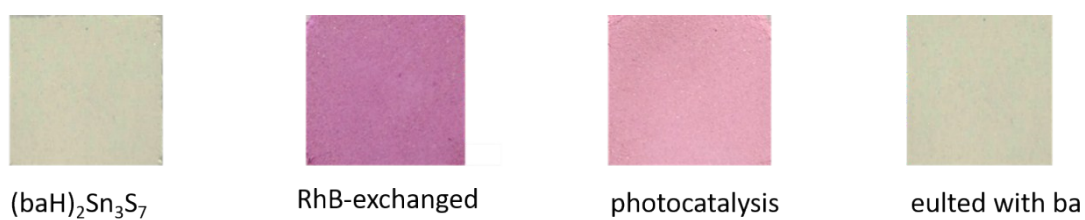

**Figure.S6** The colored photos of (baH)<sub>2</sub>Sn<sub>3</sub>S<sub>7</sub> powder undergo ion-exchange, photocatalysis and elution in a cycle experiment

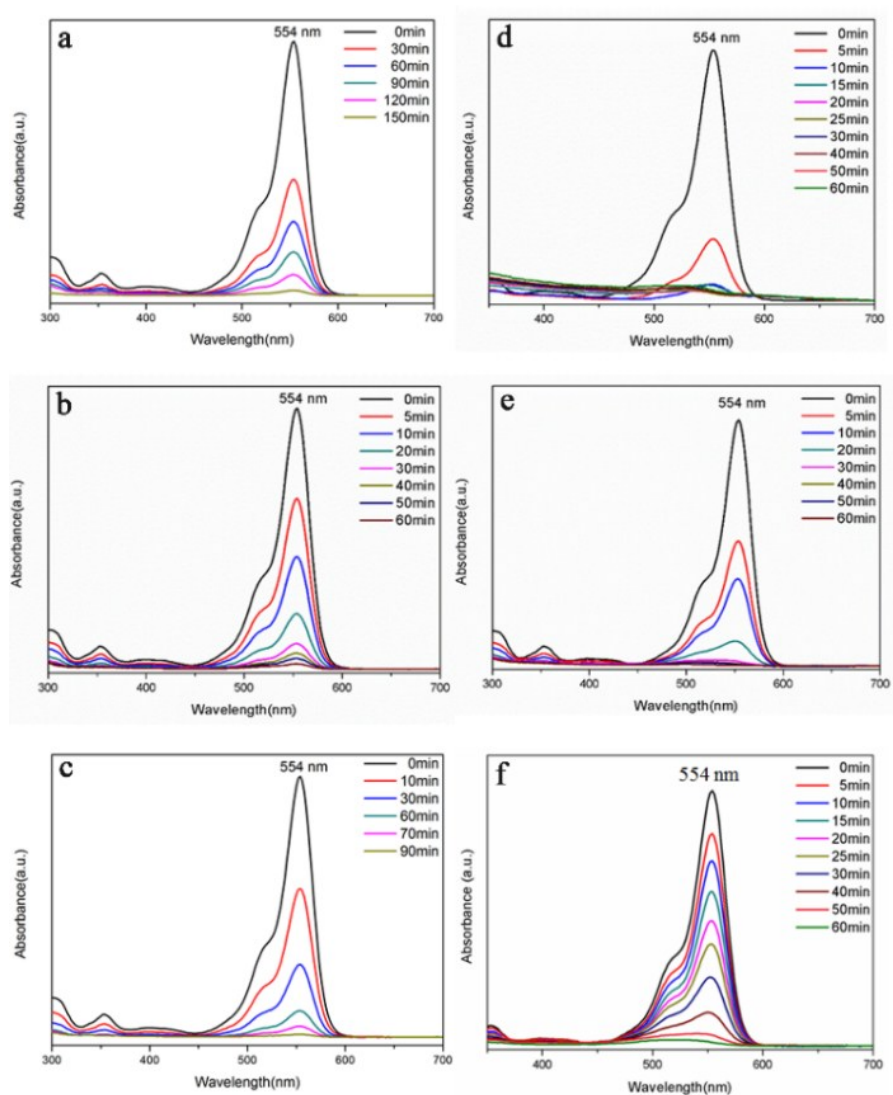

**Figure.S7** UV-Vis absorption spectra of RhB in blank experiments without illumination (a) (baH)<sub>2</sub>Sn<sub>3</sub>S<sub>7</sub>, (b) (haH)<sub>2</sub>Sn<sub>3</sub>S<sub>7</sub> and (c) (oaH)<sub>2</sub>Sn<sub>3</sub>S<sub>7</sub>; The UV-Vis absorption spectra of RhB in integrated adsorption-photocatalysis experiments (d) (baH)<sub>2</sub>Sn<sub>3</sub>S<sub>7</sub>, (e) (haH)<sub>2</sub>Sn<sub>3</sub>S<sub>7</sub> and (f) (oaH)<sub>2</sub>Sn<sub>3</sub>S<sub>7</sub>.
